# Supplementary material
Source: bioRxiv or medRxiv preprint supplement (https://medrxiv.org/highwire/filestream/96605/field_highwire_adjunct_files/0/2020.09.11.20193052-1.pdf)
Supplement: Supplementary file [file 2020.09.11.20193052-1.pdf]

# Supplementary material: Adapting Lot Quality Assurance Sampling to accommodate imperfect tests: application to COVID-19 serosurveillance in Haiti

## Derivation of LQAS-IMP system

$$\begin{aligned}
 \beta &\geq P(X \geq d; p_l, S_e, S_p, n, N) \text{ (note: for ease of exposition, parameters are dropped)} \\
 &= \sum_{i=d}^n P(X = i) \\
 &= \sum_{i=d}^n \sum_{k=0}^n P(X = i | D^+ = k) P(D^+ = k) \\
 &= \sum_{i=d}^n \sum_{k=0}^n P(T_+^+ + T_-^+ = i | D^+ = k) P(D^+ = k) \\
 &= \sum_{i=d}^n \sum_{k=0}^n \sum_{l=0}^k P(T_+^+ = l, T_-^+ = i - l | D^+ = k) P(D^+ = k) \\
 &= \sum_{i=d}^n \sum_{k=0}^n \sum_{l=0}^k P(T_+^+ = l | D^+ = k; S_e) P(T_-^+ = i - l | D^+ = k; S_p) P(D^+ = k; N, n, p_l)
 \end{aligned}$$

Under same logic as  $\beta$ ,

$$\begin{aligned}
 \alpha &\geq P(X < d; p_u, S_e, S_p, n, N) \\
 &= \sum_{i=0}^{d-1} \sum_{k=0}^n \sum_{l=0}^k P(T_+^+ = l | D^+ = k; S_e) P(T_-^+ = i - l | D^+ = k; S_p) P(D^+ = k; N, n, p_u)
 \end{aligned}$$
